# Supplementary material
Source: publisher site journal article supplement (https://www.spandidos-publications.com/5535/downloadSupplementary)
Supplement: Supplementary file 1 [file downloadSupplementary]

## Sheet: Sheet1
Table SI. Raw data of CCK-8 proliferation assay.
Raw data
	24h								48h
	0	0.5	1	2	3	5	10		0	0.5	1	2	3	5	10
	0.847	0.956	1.087	1.316	1.287	1.103	0.997		0.971	1.108	1.284	1.507	1.607	1.397	1.127
	0.847	0.987	0.997	1.224	1.356	1.057	0.956		0.964	1.156	1.214	1.512	1.561	1.433	1.259
	0.867	0.969	1.104	1.247	1.324	1.112	0.967		1.019	1.128	1.257	1.512	1.597	1.487	1.208
	0.533	0.642	0.773	1.002	0.973	0.789	0.683		0.657	0.794	0.97	1.193	1.293	1.083	0.813
	0.533	0.673	0.683	0.91	1.042	0.743	0.642		0.65	0.842	0.9	1.198	1.247	1.119	0.945
	0.553	0.655	0.79	0.933	1.01	0.798	0.653		0.705	0.814	0.943	1.198	1.283	1.173	0.894
cell viability	1	1.2045	1.45028	1.87992	1.82552	1.4803	1.28143		1	1.20852	1.47641	1.81583	1.96804	1.6484	1.23744
	1	1.26266	1.28143	1.70732	1.95497	1.394	1.2045		1	1.29538	1.38462	1.84308	1.91846	1.72154	1.45385
	1	1.18445	1.42857	1.68716	1.8264	1.44304	1.18083		1	1.15461	1.33759	1.69929	1.81986	1.66383	1.26809
means	1	1.21721	1.38676	1.75813	1.86896	1.43911	1.22225		1	1.21951	1.39954	1.78607	1.90212	1.67792	1.31979
SD	0	0.0406256	0.0918652	0.105954	0.0744871	0.0432857	0.0525938		0	0.071027	0.0706024	0.0763742	0.0754289	0.0385514	0.117101
				24h	48h
			0	1	1		0	0
			0.5	1.21721	1.21951		0.0406256	0.071027
			1	1.38676	1.39954		0.0918652	0.0706024
			2	1.75813	1.78607		0.105954	0.0763742
			3	1.86896	1.90212		0.0744871	0.0754289
			5	1.43911	1.67792		0.0432857	0.0385514
			10	1.22225	1.31979		0.0525938	0.117101
